# Supplementary material
Source: Springer Nature journal article supplement (https://www.springermedizin.de/resource/supplementary/12891_2008_536_MOESM1_ESM.pdf/9511258)
Supplement: MOESM1 [file 9511258]

## Training & Baseline Data Collection

Train-the-Trainer Meeting (training of Facilitator)  
Training Quality Circle Meeting (3 months)  
Circle Member Baseline Data Collection (2 to 3 months)  
Total Duration: 5 to 6 months

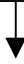

## First Educational Intervention & First Follow-Up Data Collection

Train-the-Trainer Meeting (training of Facilitator)  
Profile Generation, and Dissemination  
Educational Intervention Circle Meeting (4 months)  
Circle Member Follow-up Data Collection (2 to 3 months)  
Total Duration: 6 to 7 months

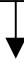

## First Strategy Implementation Session

Train-the-Trainer Meeting (training of Facilitator)  
Implementation of Care Strategies Circle Meeting (2 months)  
Plans were implemented over 3 months  
Total Duration: 5 months

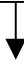

## Final Educational Intervention & Final Follow-up Data Collection

Train-the-Trainer Meeting (training of Facilitator)  
Profile Generation, and Dissemination  
Modified Educational Intervention Circle Meeting (4 months)  
Circle Member Follow-up Data Collection (2 months)  
Total Duration: 6 month

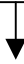

## Final Strategy Implementation Session

Train-the-Trainer Meeting (training of Facilitator)  
Implementation of Care Strategies Circle Meeting (2 months)  
Close-out (Circle members, Facilitator and Specialist)  
Total Duration: 2 months
